# Supplementary material for: Phase controlled one-pot synthesis of heterostructured FePt–Fe3O4 nanocubes with excellent biocompatibility
Source: Royal Society of Chemistry journal article supplement (doi:10.1039/d0ra06911f), 2020-01-01
Supplement: d0ra06911f1.pdf [file d0ra06911f1.pdf]

## Supporting Information

### Phase controlled one-pot synthesis of heterostructure FePt-Fe<sub>3</sub>O<sub>4</sub> nanocubes with excellent biocompatibility

Yunji Eom, Yumin Kang, Satish Kasturi, Sri Ramulu Torati\*, CheolGi Kim\*

*Department of Emerging Materials Science, DGIST, Daegu-42988, Republic of Korea*

\*Corresponding authors: Tel: +82-53-785-6516, Fax: +82-53-785-6509

E-mail: [srtorati@dgist.ac.kr](mailto:srtorati@dgist.ac.kr) (Sri Ramulu Torati) [cgkim@dgist.ac.kr](mailto:cgkim@dgist.ac.kr) (CheolGi Kim)

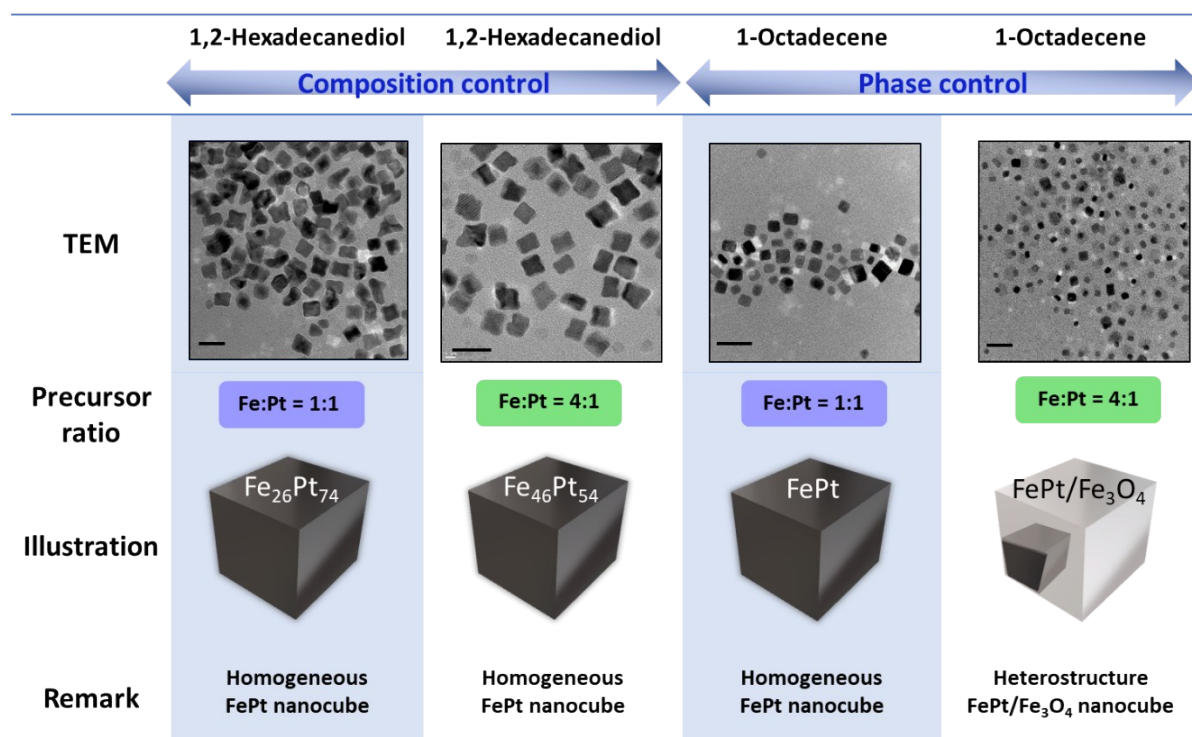

Fig. S1. Summary of composition and phase-controlled FePt/Fe<sub>3</sub>O<sub>4</sub> NCs.

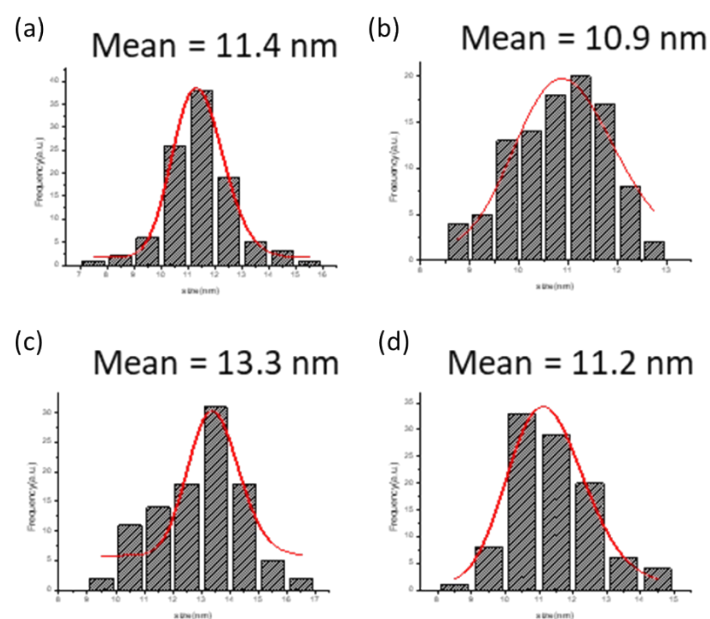

**Fig. S2.** Size distribution of FePt NCs with different precursor ratio of Fe to Pt (a) 1:1 (b) 2:1 (c) 3:1 (d) 4:1

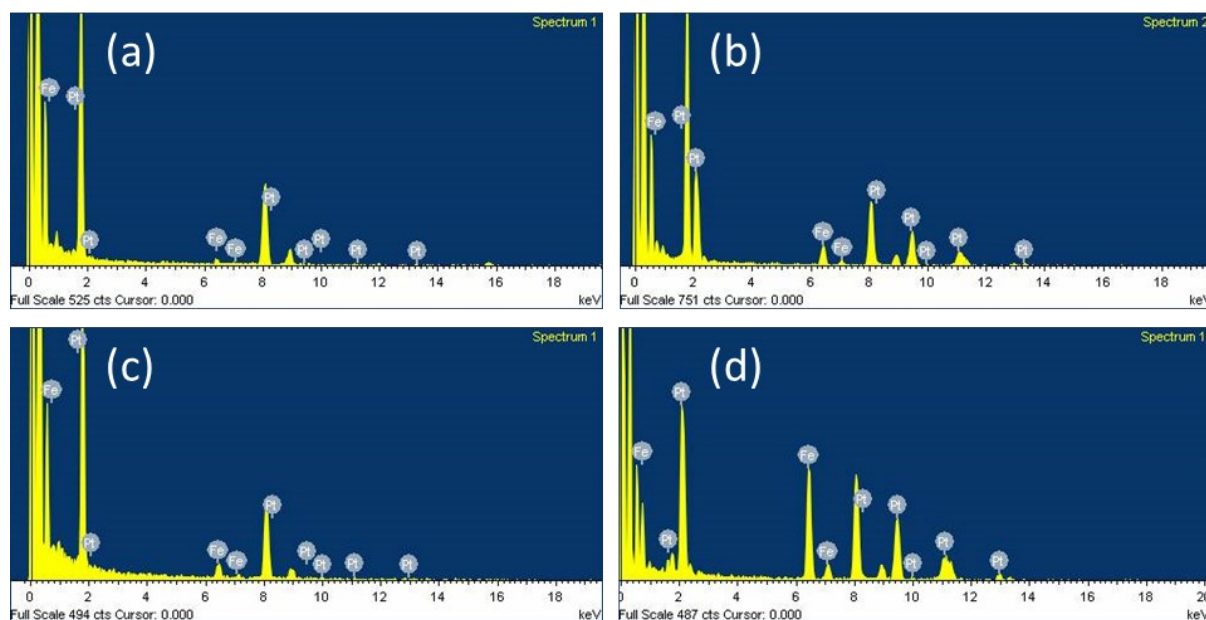

**Fig. S3.** EDS spectra of FePt NCs with different precursor ratio of Fe to Pt (a) 1:1 (b) 2:1 (c) 3:1 (d) 4:1 using 1, 2- hexadecanediol.

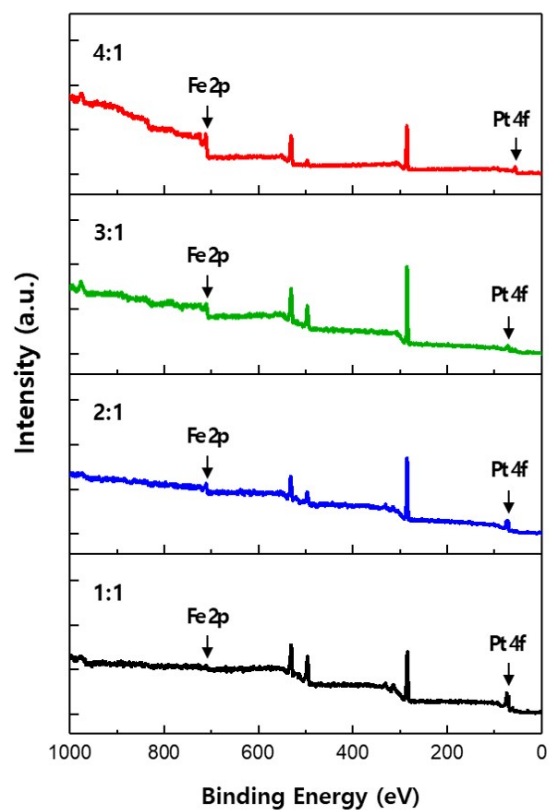

Fig. S4. XPS spectra of FePt NCs synthesized at various precursor ratio of Fe:Pt from 1:1 to 4:1.

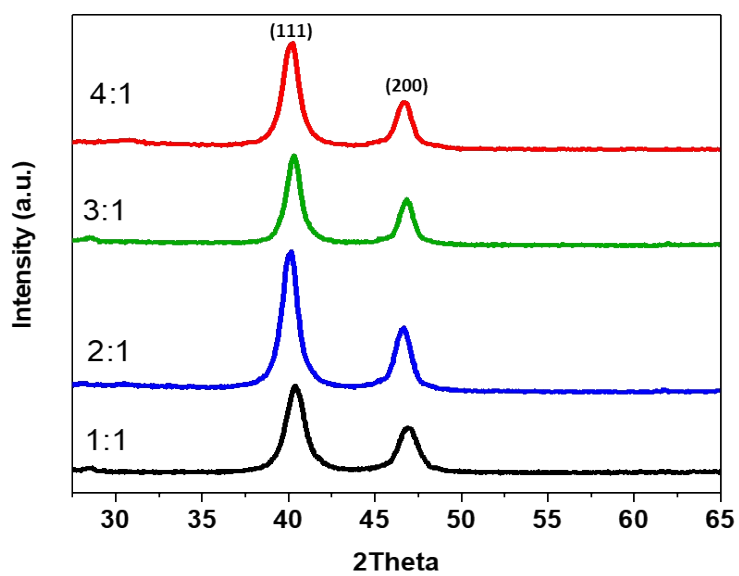

Fig. S5. The XRD patterns of FePt NCs synthesized at different precursor ratio of Fe:Pt from 1:1 to 4:1.

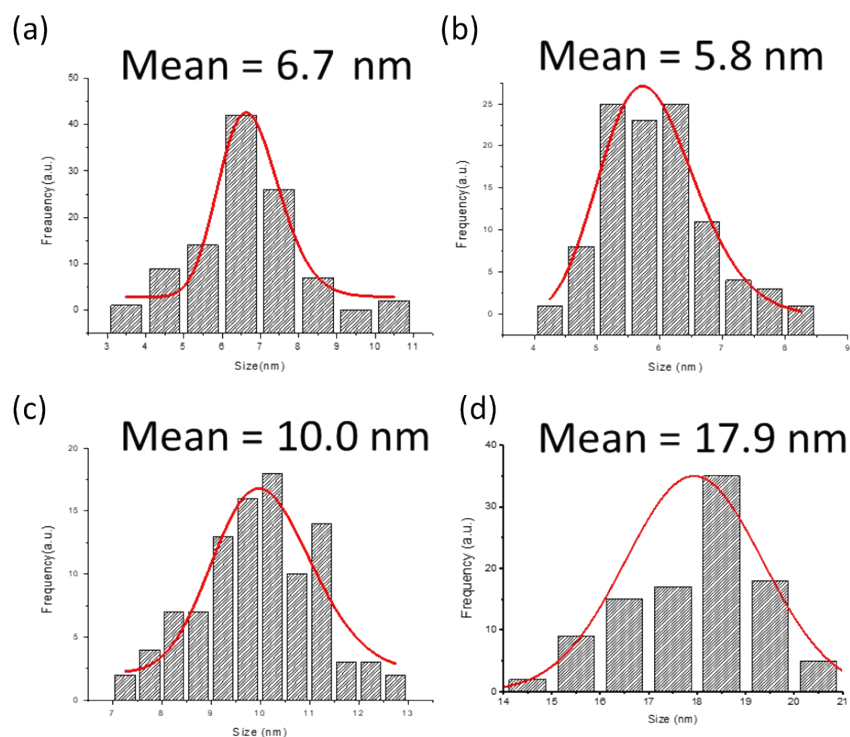

**Fig. S6.** Size distribution of FePt and FePt/Fe<sub>3</sub>O<sub>4</sub> NCs with different precursor ratio (a) 1:1 (b) 2:1 (c) 3:1 (d) 4:1.

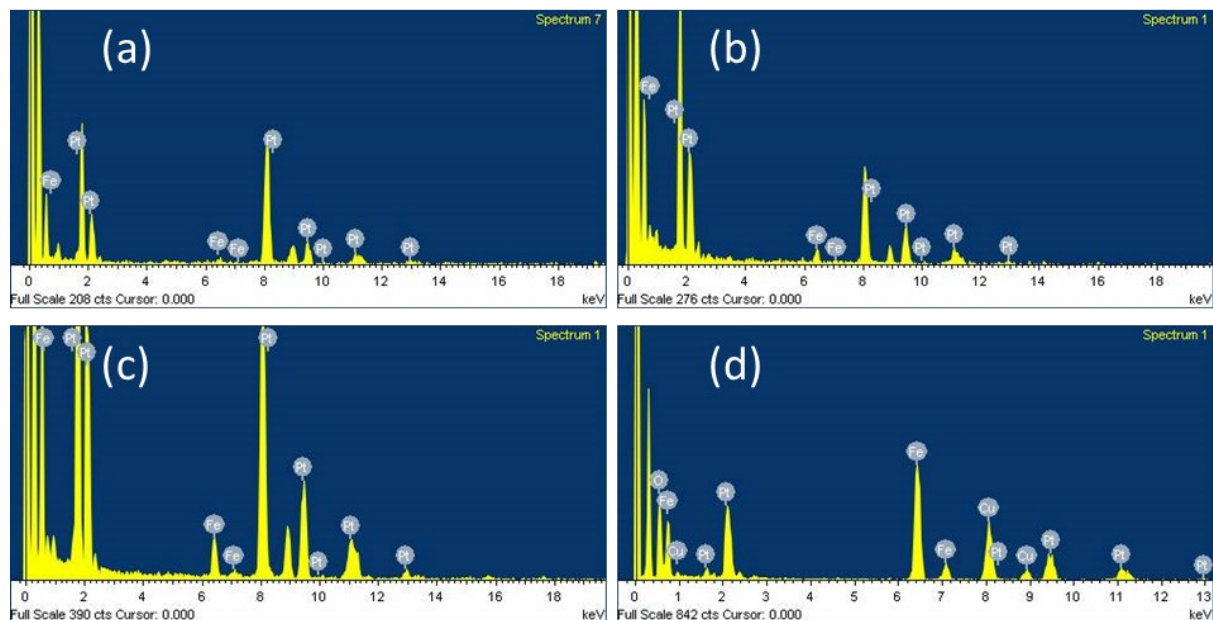

**Fig. S7.** EDS spectra of FePt NCs with different precursor ratio of Fe to Pt (a) 1:1 (b) 2:1 (c) 3:1 (d) 4:1 using octadecene.

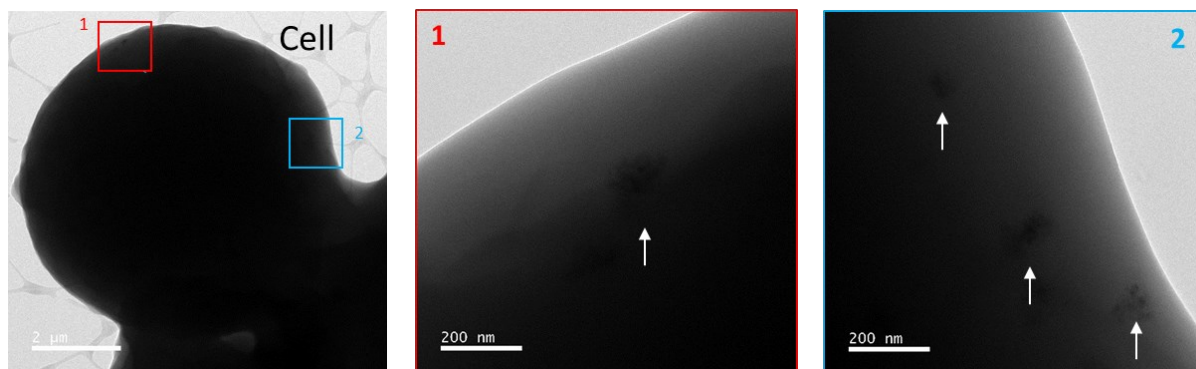

Fig. S8. TEM image of THP-1 cells treated with FePt NCs, clearly showing the internalization of particles.
